# Supplementary material
Source: Research Square preprint supplement (doi:10.21203/rs.3.rs-9227175/v1)
Supplement: Supplementary file 1 [file 8f9ec0f2eb679f7160696dff.docx]

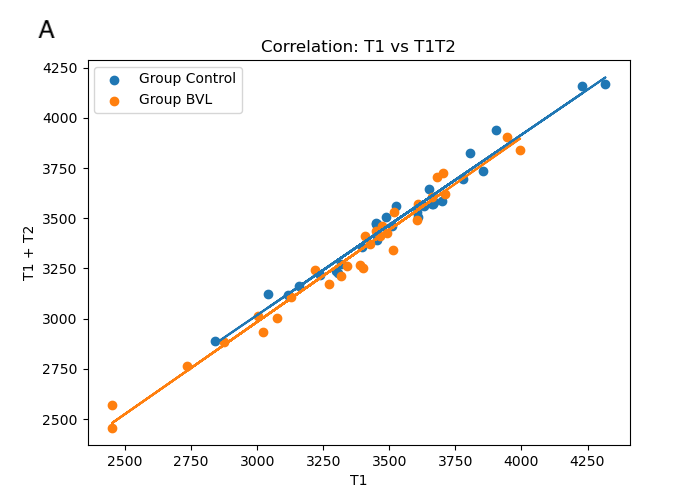


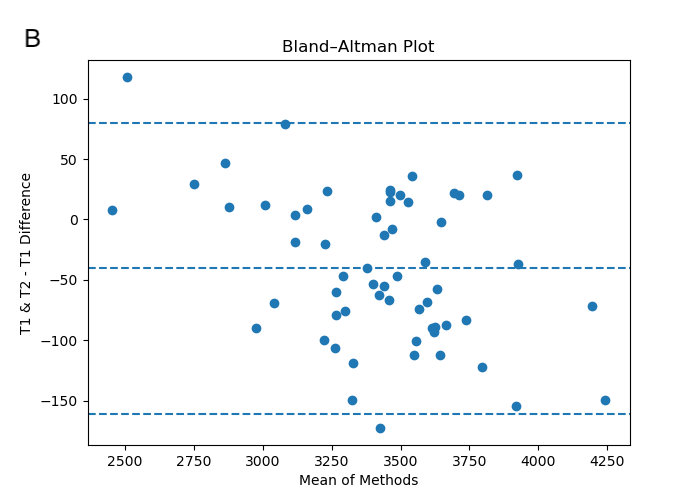


Figure S1 – A – correlation plot between two modalities of hippocampal volume evaluation using FreeSurfer, both axes show hippocampal volume in mm3; B – Bland-Altman plot showing the difference in volumes between methods (mm3) as a function of the total volume, showing a slight systematic difference between methods (<50 mm3). *Note : Datasets analyzed using different modalities were not compared between them in the study.*
